# Supplementary material
Source: PubMed Central journal article supplement (PMC6941383)
Supplement: ao9b03222_si_001.pdf [file ao9b03222_si_001.pdf]

# Electrostatic deposition of the oxidized kraft lignin onto surface on aminosilicas: thermal and structural characteristics of hybrid materials

Tetyana M. Budnyak<sup>1\*</sup>, Ievgen V. Pylypchuk<sup>1</sup>, Mikael E. Lindström<sup>1,2</sup>, Olena Sevastyanova<sup>1,2\*</sup>

<sup>1</sup> KTH Royal Institute of Technology, Department of Fiber and Polymer Technology, Division of Wood Chemistry and Pulp Technology, Teknikringen 56-58, SE-100 44 Stockholm, Sweden

<sup>2</sup> KTH Royal Institute of Technology, Department of Fiber and Polymer Technology, Wallenberg Wood Science Center (WWSC), Teknikringen 56-58, SE-100 44 Stockholm, Sweden

\* Correspondence: [tetyanabudnyak@yahoo.com](mailto:tetyanabudnyak@yahoo.com), [olena@kth.se](mailto:olena@kth.se); Tel.: +46 8 790 8067

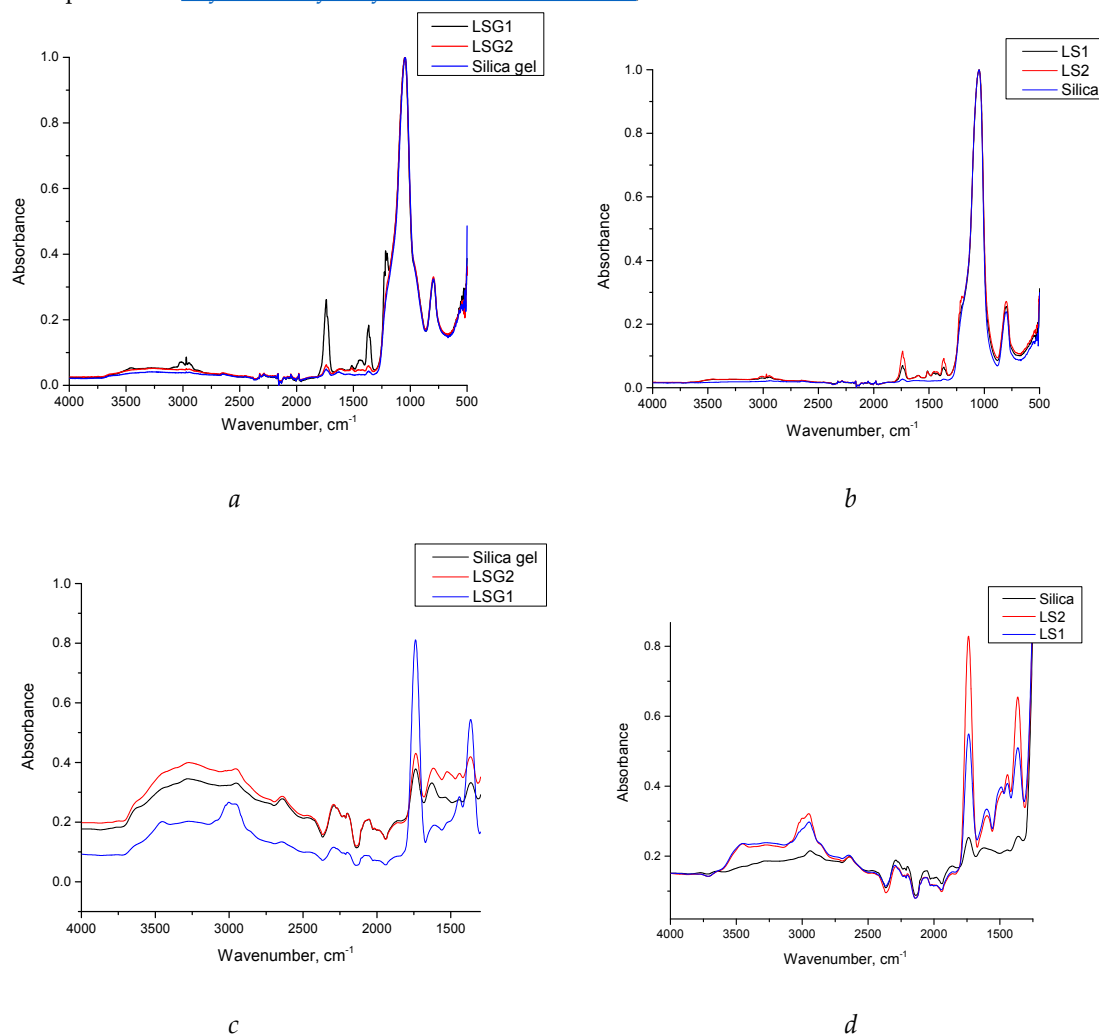

Figure S1. FTIR spectra of synthesized (a,c) lignin-silica gel composites, (b,d) lignin-silica composites and initial materials plotted at wavenumber ranges (a,b) 4000–500 cm<sup>-1</sup> and (c,d) 4000–1250 cm<sup>-1</sup>.

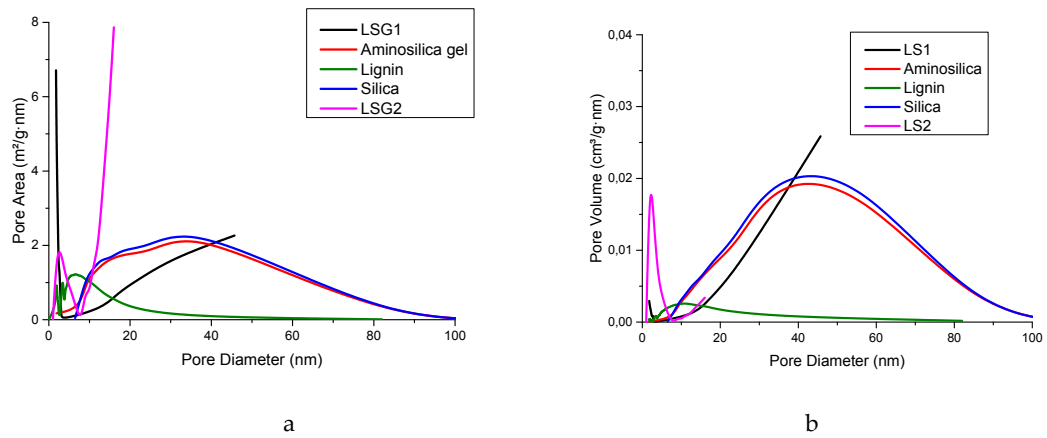

Figure S2. Pore size distribution by area and volume for (a) lignin-silica gel, (b) lignin-silica and initial lignin, silica, aminosilica and aminosilica gel.

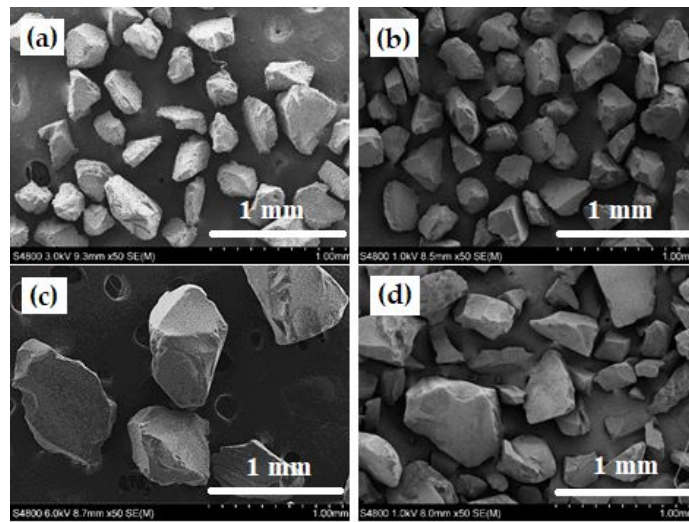

Figure S3. SEM images of LB-silica gel (a, b) and LB-silica composites (c, d).
